# Supplementary material for: Oral Delivery of Transferrin Coated Rivastigmine Microspheres for Alzheimer’s Disease Therapy
Source: Research Square preprint supplement (doi:10.21203/rs.3.rs-5675776/v1), 2025-04-18
Supplement: Supplementary file 1 [file db8510120b9c1990f0476f21.docx]

**Supplementary Information**

**for**

**Oral Delivery of Transferrin Coated Rivastigmine Microspheres for Alzheimer’s Disease Therapy**

*Omkar Khaire, Kailash Ahirwar, Ajit Singh, Rahul Shukla1* and S.J.S. Flora2**

1Department of Pharmaceutics, National Institute of Pharmaceutical Education and Research (NIPER) – Raebareli, Lucknow, 226002, India

**Table 1S.** Independent Parameters and Level Values

| **Actual coded value** | **(A) PCL weight (mg)** | **(B) PVA conc. (%)** | **(C) Stirring rate (r.p.m)** |
| --- | --- | --- | --- |
| 1 | 200 | 0.6 | 10000 |
| 0 | 150 | 0.4 | 9000 |
| -1 | 100 | 0.2 | 8000 |

**Table 2S.** ANOVA of calculated model for responses

| **Parameters** | **Particle Size** | **Uniformity** | **EE%** |
| --- | --- | --- | --- |
| **Model** | | | |
| **Sum of Squares** | **0.4502** | **0.0833** | **106.5** |
| **df** | **9** | **9** | **6** |
| **Mean Square** | **0.05** | **0.0093** | **17.75** |
| **F-value** | **67.38** | **54.66** | **23.43** |
| **p-value** | **0.0001** | **0.0002** | **0.0001** |
| **Lack of Fit** | | | |
| **Sum of Squares** | **0.0037** | **0.0007** | **4.59** |
| **df** | **3** | **3** | **6** |
| **Mean Square** | **0.0012** | **0.0002** | **0.7645** |
| **F-value** | **1.52** | **2.26** | **1.04** |
| **p-value** | **0.3421** | **0.3210** | **0.5663** |

**Table 3S.** Comparative evaluated data between predicted value and observed value

| **Independent variable** | **Predicted value** | **Observed value** | **Residual value** |
| --- | --- | --- | --- |
| Particle size | 3.054 | 3.261 | 0.207 |
| Uniformity | 0.266 | 0.275 | 0.009 |
| EE% | 86.51 | 87.72 | 1.21 |

**Table 4S.** Characteristic Peaks of drug, excipients, and formulation in FTIR Spectra

| **Sample** | **Functional group** | **Wave number)** |
| --- | --- | --- |
| RHT | -C=O Str (amide) | 1600-1630 |
| -C-O Str (alcohol) | 1050 |
| -C-N Str | 1000-1250 |
| -C-H Str | 2960-2850 |
| PVA | O-H Str | 3700-3500 |
| -C-H Str | 2960-2850 |
| -C-O Str (alcohol) | 1050 |
| -C-H (bending) | 1465 |
| PCL | O-H Str | 3700-3500 |
| -C-H Str | 2960-2850 |
| -C=O Str (ester) | 1750-1730 |
| -C-O Str | 1050 |
| Transferrin | -C=O Str (amide) | 1600-1630 |
| N-H Str | 3500-3300 |
| -C-H (bending) | 1465 |
| Physical mixture | -C=O Str (amide) | 1600-1630 |
| O-H Str | 3700-3500 |
| -C-H (bending) | 1465 |
| -C-N Str | 1000-1250 |
| Uncoated formulation | -C-H Str | 2960-2850 |
| -C-N Str | 1000-1250 |
| -C-O Str (alcohol) | 1050 |
| Coated formulation | N-H Str | 3500-3300 |
| -C-H (bending) | 1465 |
| -C-O Str (alcohol) | 1050 |

**Table 5S.** Regression coefficient (R2) values of release kinetic model for pH 1.2, 6.8, and 7.4

| **Fitted Model** | **pH** | **R2** | | |
| --- | --- | --- | --- | --- |
| **Free Drug** | **UC-MS** | **C-MS** |
| **Zero Order Model** | 1.2 | 0.9831 | 0.9919 | 0.9945 |
| **Higuchi Model** | 6.8 | 0.9479 | 0.9713 | 0.9754 |
| **Higuchi Model** | 7.4 | 0.9592 | 0.9718 | 0.9895 |

Note: The n value for the Higuchi model was calculated to be 0.9895. The 0.9895 < n showed non-fickian drug release pattern from both uncoated and transferrin coated microsphere.
